# Supplementary material for: Development of astaxanthin-loaded layer-by-layer emulsions: physicochemical properties and improvement of LPS-induced neuroinflammation in mice
Source: Royal Society of Chemistry journal article supplement (doi:10.1039/d0fo03018j), 2021-01-01
Supplement: d0fo03018j1.pdf [file d0fo03018j1.pdf]

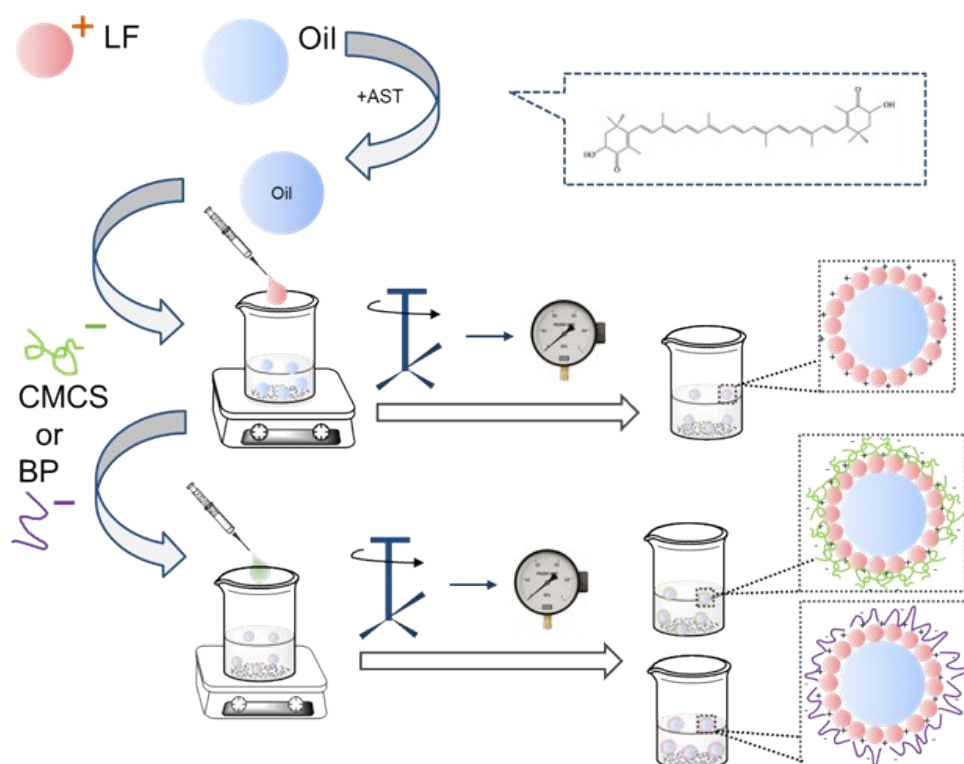

**Figure S1.** The schematic diagram of the formation process of astaxanthin-loaded layer-by-layer emulsions.

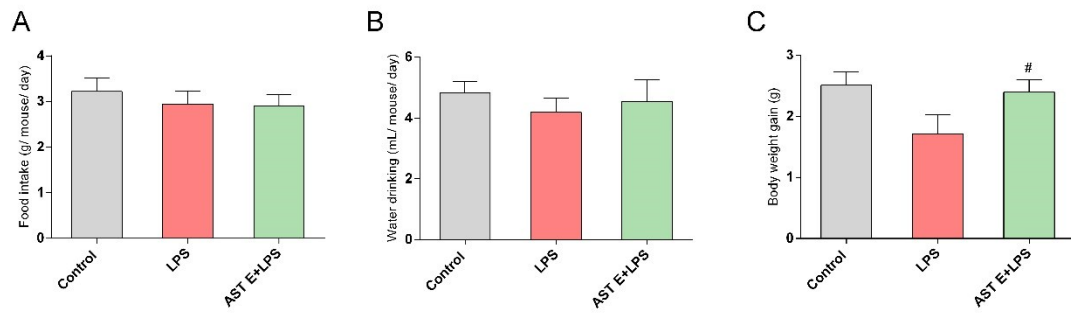

**Figure. S2** Effect of astaxanthin emulsion on body weight and dietary water intake of LPS-induced mice. (A): food intake; (B): water intake; (C): body weight gain. Data presented as mean  $\pm$  SEM, n=10. # $p < 0.05$ , versus LPS mice group.

|                | Forward primer           | Reverse primer           |
|----------------|--------------------------|--------------------------|
| <i>GAPDH</i>   | TGGAGAAACCTGCCAAGTATGA   | TGGAAGAATGGGAGTTGCTGT    |
| <i>COX-2</i>   | GAAGTCTTTGGTCTGGTGCCT    | GCTCCTGCTTGAGTATGTCG     |
| <i>iNOS</i>    | GGAGCGAGTTGTGGATTG       | CCAGGAAGTAGGTGAGGG       |
| <i>TNF-α</i>   | CCCTCACACTCAGATCATCTTCT  | GCTACGACGTGGGCTACAG      |
| <i>IL-1β</i>   | TGACGGACCCCAAAGATGA      | TCTCCACAGCCACAATGAGT     |
| <i>IL-6</i>    | TTCCATCCAGTTGCCTTCTTG    | TATCCTCTGTGAAGTCTCCTCTC  |
| <i>IL-10</i>   | GCTCCAAGACCAAGGTGTCTACAA | CCGTTAGCTAAGATCCCTGGATCA |
| <i>HO-1</i>    | ATGTGGCCCTGGAGGAGGAGA    | CGCTGCATGGCTGGTGTGTAG    |
| <i>NQO-1</i>   | GGATTGGACCGAGCTGGAA      | AATTGCAGTGAAGATGAAGGCAAC |
| <i>MMP9</i>    | CATTCGCGTGGATAAAGGAGT    | ACCTGGTTCACCTCATGGTC     |
| <i>BDNF</i>    | CTCCGCCATGCAATTTCCACT    | GCCTTCATGCAACCGAAGTA     |
| <i>NT-3</i>    | GTTCCAGCCAATGATTGCAA     | GGGCGAATTGTAGCGTCTCT     |
| <i>NT-4</i>    | CAAGGCTAAGCAGTCCTATGT    | CAGTCATAAGGCACGGTAGAG    |
| <i>PSD-95</i>  | TCTGTGCGAGAGGTAGCAGA     | AAGCACTCCGTGAACTCCTG     |
| <i>SNAP-25</i> | CTGGCTGATGAGTCCCTGG      | GACCGACTACTCAGGGACC      |

Table S1. Primer sequences used for qRT-PCR analysis

Table S2. Components of secondary structures of lactoferrin heated at different temperatures

| Thermal treatment<br>condition | Content of different secondary structures (%) |                |                |             |
|--------------------------------|-----------------------------------------------|----------------|----------------|-------------|
|                                | $\alpha$ -Helical                             | $\beta$ -Sheet | $\beta$ -Turns | Random coil |
| 25°C                           | 23.83                                         | 24.11          | 17.35          | 34.71       |
| 70°C                           | 17.4                                          | 33.6           | 21.4           | 27.3        |
| 95°C                           | 12.29                                         | 38.0           | 21.20          | 29.1        |

Table S3. AST content (mg/mL) in different AST emulsions during photodegradation kinetic test

| Time /min | 25°C LF | 70°C LF | 95°C LF | 95°C LF-CMCS | 95°C LF-BP |
|-----------|---------|---------|---------|--------------|------------|
| 0         | 1.5000  | 1.5000  | 1.5000  | 1.5000       | 1.5000     |
| 10        | 1.3120  | 1.4350  | 1.42401 | 1.4673       | 1.4523     |
| 20        | 1.2079  | 1.3944  | 1.3423  | 1.2760       | 1.4128     |
| 30        | 0.9946  | 1.3217  | 1.3228  | 1.1848       | 1.3461     |
| 40        | 0.9443  | 1.1788  | 1.2420  | 1.1748       | 1.2808     |
| 60        | 0.8730  | 1.0315  | 1.1758  | 1.0534       | 1.2286     |
| 90        | 0.7312  | 0.9812  | 1.0967  | 0.9398       | 1.2093     |
| 120       | 0.7716  | 0.9981  | 1.0235  | 0.9207       | 1.2103     |
| 150       | 0.7261  | 0.9805  | 0.9882  | 0.9431       | 1.1678     |
| 180       | 0.6188  | 0.9507  | 1.0001  | 0.8458       | 1.1286     |
| 210       | 0.6299  | 0.8569  | 0.9414  | 0.7621       | 1.0292     |
| 240       | 0.6113  | 0.7767  | 0.8822  | 0.7271       | 0.9347     |
| 270       | 0.5778  | 0.7088  | 0.9109  | 0.6338       | 0.9116     |
| 300       | 0.5549  | 0.6932  | 0.8259  | 0.6458       | 0.9074     |
| 330       | 0.4369  | 0.6254  | 0.8293  | 0.6187       | 0.9171     |
| 360       | 0.3647  | 0.5775  | 0.7245  | 0.6107       | 0.8007     |
| 390       | 0.3068  | 0.5344  | 0.6549  | 0.5540       | 0.7824     |
| 420       | 0.2947  | 0.4994  | 0.5951  | 0.4873       | 0.7232     |
| 450       | 0.2564  | 0.4439  | 0.5463  | 0.4467       | 0.6623     |
| 480       | 0.2254  | 0.3783  | 0.5240  | 0.3548       | 0.5907     |

Table S4. Half-lives for photodegradation kinetic of AST in different emulsions

| Sample          | 25°C LF | 70°C LF | 95°C LF | 95°C LF-CMCS | 95°C LF-BP |
|-----------------|---------|---------|---------|--------------|------------|
| $t_{1/2}$ (min) | 208.152 | 276.154 | 359.144 | 281.767      | 412.588    |

Table S5. Effects of AST emulsion on the body and tissues weight of LPS-induced C57BL/6J mice

Note: Data presented as mean  $\pm$  SEM, n=10. \* $p$  < 0.05, \*\* $p$  < 0.01, versus Control mice group. # $p$  < 0.05, versus LPS mice group.

|                 | Control          | LPS               | AST E+LPS        |
|-----------------|------------------|-------------------|------------------|
| Body Weight (g) | 24.16 $\pm$ 1.37 | 23.56 $\pm$ 1.25  | 23.61 $\pm$ 1.32 |
| Liver (g)       | 1.00 $\pm$ 0.08  | 1.28 $\pm$ 0.11   | 1.03 $\pm$ 0.04  |
| Spleen (g)      | 0.065 $\pm$ 0.02 | 0.14 $\pm$ 0.02** | 0.11 $\pm$ 0.03# |
| Kidney (g)      | 0.28 $\pm$ 0.03  | 0.30 $\pm$ 0.03   | 0.28 $\pm$ 0.04  |
| Brain (g)       | 0.16 $\pm$ 0.01  | 0.15 $\pm$ 0.06   | 0.12 $\pm$ 0.02  |
